# Supplementary material for: Mental Health Care Use Among U.S. Military Veterans: Results From the 2019–2020 National Health and Resilience in Veterans Study
Source: Atypon-hosted journal article supplement (doi:10.1176/appi.ps.202100112), 2021-11-15

## **Online supplement for DOI 10.1176/appi.ps.202100112**

### *Data collection*

The survey was conducted from 11/18/19 to 3/8/20 (median completion date: 11/21/19). The NHRVS sample was drawn from KnowledgePanel, a research panel of more than 50,000 households that is maintained by Ipsos, a survey research firm. KnowledgePanel® is a probability-based, online non-volunteer access survey panel of a nationally representative sample of U.S. adults that covers approximately 98% of U.S. households. Panel members are recruited through national random samples, originally by telephone and now almost entirely by postal mail. Households are provided with access to the Internet and computer hardware if needed. KnowledgePanel® recruitment uses dual sampling frames that include both listed and unlisted telephone numbers, telephone and non-telephone households, and cell-phone-only households, as well as households with and without Internet access. The target population for the NHRVS was non-institutionalized adults age 18 and older residing in the U.S. who are U.S. military veterans. A total of 7,860 panel members who reported having served in the U.S. military received an email invitation to complete the survey and 4,069 completed it (52% participation rate). To generalize study results to the entire population of U.S. veterans, Ipsos statisticians calculated post-stratification weights from the following benchmark distributions of U.S. military veterans from the most recent (August 2019) Current Veteran Population Supplemental Survey of the U.S. Census Bureau's American Community Survey: age, gender, race/ethnicity, Census Region, metropolitan status, education, household income, branch of service, and years in service. Final post-stratification weights were produced via an iterative proportional fitting (raking) procedure.

*Results from examining veterans without a positive screen for a mental or substance use disorder.*

We ran parallel analyses in the subset of veterans ( $n=3007$ ; 74%) without a probable mental or substance use disorder. Of these veterans, 186 (6%) were engaged in mental health treatment.

Multivariable analyses indicated that younger age (OR=0.96, 95% CI=0.94-0.97,  $p<.001$ ), not being married/partnered (OR=0.52, 95% CI=0.33-0.80,  $p=.003$ ), current employment (OR=0.53, 95% CI=0.33-0.84,  $p=.007$ ), greater received social support (OR=1.06, 95% CI=1.01-1.11,  $p=.015$ ), greater psychological distress (OR=2.84, 95% CI=1.79-4.53,  $p<.001$ ), more medical conditions (OR=1.27, 95% CI=1.15-1.39,  $p<.001$ ), lifetime suicide attempt (OR=3.95, 95% CI=1.82-8.56,  $p=.001$ ), lower functioning (OR=0.43, 95% CI=0.30-0.62,  $p<.001$ ), lower resilience (OR=0.95, 95% CI=0.92-0.99,  $p=.022$ ), and not endorsing the beliefs “I do not know where to get help” (OR=0.21, 95% CI=0.05-0.77,  $p<.001$ ), “Getting treatment costs too much money” (OR=0.47, 95% CI=0.23-0.95), and “I do not trust mental health professionals” (OR=0.38, 95% CI=0.15-0.99), and endorsing the belief “It is difficult to schedule an appointment” (OR=3.56, 95% CI=1.45-8.75) were associated with greater likelihood of mental healthcare utilization.

Relative importance analysis indicated that mental (17%) and cognitive (12%) dysfunction, PTSD symptom severity (11%), chronic pain (9%), and not endorsing the belief “I do not trust mental health professionals” (8%) explained the majority of the variance in mental health treatment utilization.

Table S1. Study measures

| Variable                                   | Assessment                                                                                                                                                                                                                                                                                                                                                                                                                                                                                                           | Factor loading |
|--------------------------------------------|----------------------------------------------------------------------------------------------------------------------------------------------------------------------------------------------------------------------------------------------------------------------------------------------------------------------------------------------------------------------------------------------------------------------------------------------------------------------------------------------------------------------|----------------|
| Current probable PTSD                      | PTSD Checklist for DSM-5 (50), where a positive screen was defined as a score $\geq 33$ ( $\alpha = 0.96$ ; 45).                                                                                                                                                                                                                                                                                                                                                                                                     | -              |
| Current probable major depressive disorder | Patient Health Questionnaire-4 (49), where scores of $\geq 3$ on the depression items ( $\alpha = 0.87$ ) are indicative of a positive screen for major depressive disorder.                                                                                                                                                                                                                                                                                                                                         | -              |
| Current probable GAD                       | Patient Health Questionnaire-4 (49), where scores of $\geq 3$ on the anxiety items ( $\alpha = 0.86$ ) are indicative of a positive screen for GAD.                                                                                                                                                                                                                                                                                                                                                                  | -              |
| Current probable drug use disorder         | Screen of Drug Use (51), a brief validated measure of probable drug use disorder. Response of $\geq 7$ days to the following question is indicative of a positive screen for drug use disorder: “How many days in the past year have you used non-prescription drugs?;” if the response to this question is 6 or fewer days, a response of $\geq 2$ days to the question “How many days in the past 12 months have you used drugs more than you meant to?” is indicative of a positive screen for drug use disorder. | -              |
| Current probable alcohol use disorder      | Alcohol Use Disorders Identification Test (52); score of $\geq 8$ indicates a positive screen.                                                                                                                                                                                                                                                                                                                                                                                                                       | -              |
| Sociodemographic characteristics           | A general sociodemographic questionnaire was used to assess age (continuous), gender (male vs. female), race/ethnicity (non-Hispanic Caucasian vs. not), and education ( $\geq$ college graduate vs. $<$ college graduate), marital status (married/partnered vs. not), employment status (currently employed vs. not), annual household income ( $<$ \$60k vs. $>$ \$60k), and health insurance status.                                                                                                             | -              |
| Combat exposure                            | Assessed via number of deployments: “How many times did you deploy to a combat or war zone?” (0 vs. 1 vs. $\geq 2$ ).                                                                                                                                                                                                                                                                                                                                                                                                | -              |
| Disability                                 | Any disability in activities of daily living. The following question was asked: “At the present time, do you need help from another person to do the following?” (e.g., bathe; walk around your home or apartment; get in and out of chair). Endorsement of any of these activities was indicative of having a disability with an activity of daily living (53).                                                                                                                                                     | -              |
| Received social support                    | Score on 5-item version of the Medical Outcomes Study Social Support Scale (54).                                                                                                                                                                                                                                                                                                                                                                                                                                     | -              |
| Lifetime trauma burden                     | Count of potentially traumatic events on the Life Events Checklist for DSM-5 (55).                                                                                                                                                                                                                                                                                                                                                                                                                                   | -              |
| Adverse childhood experiences              | Score on Adverse Childhood Experiences Questionnaire (56), which assesses for seven types of childhood maltreatment (e.g., physical abuse, emotional neglect), occurring between birth and age 18 years. Items were summed for a total score, with higher scores indicating greater maltreatment.                                                                                                                                                                                                                    | -              |
| Military sexual trauma                     | Positive endorsement of the following dichotomous item: “When you were in the military, did you have sexual contact against your will or when you were unable to say no (for example, after being                                                                                                                                                                                                                                                                                                                    | -              |

|                                       |                                                                                                                                                                                                                                                                                                                                                                                                                                                                                                                                                                  |      |
|---------------------------------------|------------------------------------------------------------------------------------------------------------------------------------------------------------------------------------------------------------------------------------------------------------------------------------------------------------------------------------------------------------------------------------------------------------------------------------------------------------------------------------------------------------------------------------------------------------------|------|
|                                       | forced or threatened or to avoid other consequences)?”                                                                                                                                                                                                                                                                                                                                                                                                                                                                                                           |      |
| Current psychological distress factor | To attenuate potential multicollinearity among variables, a composite psychological distress score was computed using an exploratory factor analysis of scores on measures of depressive and anxiety symptoms (PHQ-4) (49) and posttraumatic stress symptoms (PCL-5) (50). This regression-weighted factor score provides a standardized measure of psychological distress, with 0=mean and 1=standard deviation, and higher scores indicating greater distress.                                                                                                 |      |
| Depression symptoms                   | Score on the Patient Health Questionnaire-2 (49), which assess the 2 core symptoms of depression.                                                                                                                                                                                                                                                                                                                                                                                                                                                                | .901 |
| GAD symptoms                          | Score on the Generalized Anxiety Disorder-2 (49), which assess the 2 core symptoms of GAD.                                                                                                                                                                                                                                                                                                                                                                                                                                                                       | .894 |
| PTSD symptoms                         | Score on past-month version of the PTSD Checklist for DSM-5 (50), which assessed PTSD symptoms related to veterans’ ‘worst’ event endorsed on the Life Events Checklist for DSM-5.                                                                                                                                                                                                                                                                                                                                                                               | .837 |
| Number of medical conditions          | Sum of number of medical conditions endorsed in response to question: “Has a doctor or healthcare professional ever told you that you have any of the following medical conditions?” (e.g., arthritis, cancer, diabetes, heart disease, asthma, kidney disease). Range: 0-24 conditions.                                                                                                                                                                                                                                                                         | -    |
| Insomnia severity                     | Score on the Insomnia Severity Index (57).                                                                                                                                                                                                                                                                                                                                                                                                                                                                                                                       | -    |
| Lifetime suicide attempt              | Positive endorsement of dichotomous item: “Have you ever tried to kill yourself?”                                                                                                                                                                                                                                                                                                                                                                                                                                                                                | -    |
| Functioning composite score           | To attenuate potential multicollinearity among variables, a composite functioning factor was computed using an exploratory factor analysis of scores on the physical and mental functioning component summary scores of the Short Form Health Survey-8 (58), the Medical Outcomes Study Cognitive Functioning Scale (59), and the Brief Inventory of Psychosocial Functioning (60). This regression-weighted factor score provides a standardized measure of functioning, with 0=mean and 1=standard deviation, and higher scores indicating better functioning. |      |
| Physical functioning                  | Score on the Physical Component Summary on the Short Form Health Survey-8 (58), capturing pain, general health, and the degree to which physical health affects physical activities and daily activities.                                                                                                                                                                                                                                                                                                                                                        | .528 |
| Mental functioning                    | Score on the Mental Component Summary on the Short Form Health Survey-8 (58), capturing vitality/energy, social functioning, emotional problems (i.e., depression, anxiety), and the degree to which mental health affects work, school, and daily activities.                                                                                                                                                                                                                                                                                                   | .846 |
| Cognitive functioning                 | Score on the Medical Outcomes Study Cognitive Functioning Scale (59), capturing impairment across various cognitive functions, such as memory, reasoning, confusion, and attention/concentration.                                                                                                                                                                                                                                                                                                                                                                | .835 |
| Psychosocial functioning              | Score from the Brief Inventory of Psychosocial Functioning (reverse-scored) (60), capturing functional impairment in several domains: romantic relationships, family relationships, work, friendships and socializing, parenting, education, and self-care.                                                                                                                                                                                                                                                                                                      | .853 |
| Purpose in life                       | Score on Purpose in Life Test-Short Form (61), assessing meaning and purpose in life.                                                                                                                                                                                                                                                                                                                                                                                                                                                                            | -    |
| Dispositional optimism                | Score on single-item measure of optimism from Life Orientation Test-Revised (62); “In uncertain                                                                                                                                                                                                                                                                                                                                                                                                                                                                  | -    |

---

|                                          |                                                                                                                                                                                                                                                                   |   |
|------------------------------------------|-------------------------------------------------------------------------------------------------------------------------------------------------------------------------------------------------------------------------------------------------------------------|---|
| Grit                                     | times, I usually expect the best”); rating 1=strongly disagree to 7=strongly agree.<br>Score on the Short Grit Scale (36). Grit refers to trait perseverance, extending to one’s decision/commitment to address needs on their own.                               | - |
| Stigma and barriers                      | Score on the Perceived Stigma and Barriers to Care Scale (63).                                                                                                                                                                                                    | - |
| Negative beliefs about mental healthcare | Two dichotomous items: “Mental healthcare does not work”; “I do not trust mental health professionals”                                                                                                                                                            | - |
| Current mental healthcare use            | Positively endorsing either of the following two dichotomous items: “Are you currently receiving psychotherapy or counseling for a psychiatric or emotional problem?”; “Are you currently taking prescription medication for a psychiatric or emotional problem?” |   |

---

Note. DSM-5 = Diagnostic and Statistical Manual of Mental Disorders, 5<sup>th</sup> Edition; GAD = generalized anxiety disorder; PTSD = posttraumatic stress disorder.

Table S2. Bivariate associations between characteristics of the full sample by current mental healthcare utilization status

|                                                         | <i>No current utilization</i><br>( <i>N</i> =3,588, 88%) |                   | <i>Current utilization</i><br>( <i>N</i> =433, 12%) |                   | <i>t</i> or $\chi^2$ | <i>p</i> |
|---------------------------------------------------------|----------------------------------------------------------|-------------------|-----------------------------------------------------|-------------------|----------------------|----------|
|                                                         | <i>N</i>                                                 | <i>Weighted %</i> | <i>N</i>                                            | <i>Weighted %</i> |                      |          |
| <i>Predisposing factors</i>                             |                                                          |                   |                                                     |                   |                      |          |
| Age (years) ( <i>M</i> ± <i>SD</i> )                    | 63.3±15.5                                                |                   | 53.4±14.7                                           |                   | 13.09                | <.001    |
| Gender (Male)                                           | 3,211                                                    | 92                | 319                                                 | 79                | 73.01                | <.001    |
| Race/ethnicity (Non-Hispanic white)                     | 2,958                                                    | 79                | 325                                                 | 73                | 9.86                 | .002     |
| Education (College graduate or more)                    | 1,609                                                    | 33                | 193                                                 | 33                | 0.01                 | .94      |
| # of deployments                                        |                                                          |                   |                                                     |                   | 55.19                | <.001    |
| 0 (ref)                                                 | 2,438                                                    | 68                | 255                                                 | 51                |                      |          |
| 1 deployment                                            | 707                                                      | 19                | 102                                                 | 26                |                      |          |
| 2 or more deployments                                   | 419                                                      | 13                | 72                                                  | 23                |                      |          |
| <i>Enabling factors</i>                                 |                                                          |                   |                                                     |                   |                      |          |
| Marital status (married/partnered)                      | 2,579                                                    | 73                | 273                                                 | 67                | 7.57                 | .006     |
| Annual household income (> \$60k)                       | 2,105                                                    | 60                | 226                                                 | 52                | 10.78                | .001     |
| Employment (Yes)                                        | 1,423                                                    | 48                | 169                                                 | 48                | 0.10                 | .75      |
| Health insurance                                        | 3,522                                                    | 98                | 421                                                 | 97                | 2.61                 | .11      |
| VA is primary source of healthcare                      | 580                                                      | 17                | 195                                                 | 50                | 275.25               | <.001    |
| ADL and/or IADL Disability                              | 430                                                      | 12                | 146                                                 | 35                | 170.65               | <.001    |
| Received social support ( <i>M</i> ± <i>SD</i> )        | 18.9±5.1                                                 |                   | 16.1±5.3                                            |                   | 11.14                | <.001    |
| <i>Need factors</i>                                     |                                                          |                   |                                                     |                   |                      |          |
| ACES ( <i>M</i> ± <i>SD</i> )                           | 1.4±1.8                                                  |                   | 2.5±2.5                                             |                   | 11.77                | <.001    |
| # of traumas ( <i>M</i> ± <i>SD</i> )                   | 8.5±8.2                                                  |                   | 12.2±10.0                                           |                   | 8.81                 | <.001    |
| Military sexual trauma (yes)                            | 224                                                      | 6                 | 90                                                  | 20                | 122.62               | <.001    |
| Psychological distress ( <i>M</i> ± <i>SD</i> )         | -0.2±0.8                                                 |                   | 1.2±1.5                                             |                   | 31.57                | <.001    |
| Current alcohol use disorder or drug use disorder (yes) | 487                                                      | 17                | 106                                                 | 26                | 25.22                | <.001    |
| # of medical conditions ( <i>M</i> ± <i>SD</i> )        | 2.8±2.1                                                  |                   | 4.1±2.4                                             |                   | 13.02                | <.001    |

|                                               |          |    |          |    |        |       |
|-----------------------------------------------|----------|----|----------|----|--------|-------|
| Insomnia severity ( <i>M±SD</i> )             | 6.3±5.0  |    | 12.1±7.1 |    | 22.45  | <.001 |
| Lifetime Suicide Attempt (yes)                | 72       | 3  | 64       | 15 | 160.02 | <.001 |
| Functioning ( <i>M±SD</i> )                   | 0.2±0.8  |    | -1.3±1.4 |    | 32.90  | <.001 |
| Resilience ( <i>M±SD</i> )                    | 39.7±6.4 |    | 34.3±8.1 |    | 16.68  | <.001 |
| Purpose in life ( <i>M±SD</i> )               | 21.6±4.5 |    | 18.3±5.9 |    | 14.16  | <.001 |
| Dispositional optimism ( <i>M±SD</i> )        | 5.2±1.4  |    | 4.1±1.8  |    | 15.05  | <.001 |
| Grit ( <i>M±SD</i> )                          | 3.8±0.6  |    | 3.3±0.7  |    | 15.73  | <.001 |
| <i>Perceived stigma and barriers to care</i>  |          |    |          |    |        |       |
| It would be too embarrassing                  | 373      | 12 | 41       | 10 | 2.07   | .15   |
| It would harm my reputation                   | 309      | 10 | 36       | 8  | 0.55   | .46   |
| My peers might treat me differently           | 362      | 11 | 48       | 11 | 0.00   | .99   |
| My peers would blame me for the problem       | 187      | 6  | 30       | 8  | 5.90   | .015  |
| I would be seen as weak                       | 391      | 12 | 60       | 16 | 5.69   | .017  |
| People important to me would think less of me | 355      | 11 | 53       | 15 | 4.33   | .038  |
| I do not know where to get help               | 251      | 8  | 32       | 9  | 0.84   | .36   |
| I do not have adequate transportation         | 76       | 3  | 22       | 6  | 14.94  | <.001 |
| It is difficult to schedule an appointment    | 136      | 5  | 54       | 16 | 85.63  | <.001 |
| Getting treatment costs too much money        | 524      | 16 | 78       | 20 | 4.33   | .037  |
| Mental healthcare does not work               | 257      | 8  | 38       | 11 | 4.51   | .034  |
| I do not trust mental health professionals    | 420      | 13 | 53       | 17 | 4.02   | .045  |

Note. ACES = Adverse Childhood Experiences Scale; ADL = activities of daily living; OR = odds ratio; IADL = instrumental activities of daily living.

Table S3. Bivariate associations between veterans' characteristics and current mental healthcare utilization status among veterans who screened positive for a mental and/or substance use disorder<sup>a</sup>

|                                                  | <i>No current utilization</i><br>( <i>N</i> =685, 73%) |                   | <i>Current utilization</i><br>( <i>N</i> =239, 27%) |                   | <i>t</i> or <i>x</i> <sup>2</sup> | <i>p</i> |
|--------------------------------------------------|--------------------------------------------------------|-------------------|-----------------------------------------------------|-------------------|-----------------------------------|----------|
|                                                  | <i>N</i>                                               | <i>Weighted %</i> | <i>N</i>                                            | <i>Weighted %</i> |                                   |          |
| <i>Predisposing Factors</i>                      |                                                        |                   |                                                     |                   |                                   |          |
| Age (years) ( <i>M</i> ± <i>SD</i> )             | 57.0±15.7                                              |                   | 50.6±13.6                                           |                   | 6.02                              | <.001    |
| Gender (Male)                                    | 590                                                    | 90                | 177                                                 | 78                | 25.56                             | <.001    |
| Race/ethnicity (Non-Hispanic white)              | 538                                                    | 77                | 173                                                 | 72                | 2.99                              | .084     |
| Education (College graduate or more)             | 247                                                    | 27                | 99                                                  | 30                | 1.05                              | .31      |
| # of deployments                                 |                                                        |                   |                                                     |                   | 39.89                             | <.001    |
| 0 (ref)                                          | 462                                                    | 66                | 132                                                 | 45                |                                   |          |
| 1 deployment                                     | 130                                                    | 21                | 58                                                  | 29                |                                   |          |
| 2 or more deployments                            | 88                                                     | 14                | 48                                                  | 26                |                                   |          |
| <i>Enabling Factors</i>                          |                                                        |                   |                                                     |                   |                                   |          |
| Marital status (married/partnered)               | 456                                                    | 67                | 151                                                 | 66                | 0.04                              | .84      |
| Annual household income (> \$60k)                | 366                                                    | 52                | 119                                                 | 47                | 1.98                              | .16      |
| Employment (Yes)                                 | 309                                                    | 54                | 92                                                  | 49                | 2.22                              | .14      |
| Health insurance                                 | 666                                                    | 96                | 231                                                 | 95                | 0.27                              | .60      |
| VA is primary source of healthcare               | 142                                                    | 22                | 128                                                 | 59                | 135.27                            | <.001    |
| ADL and/or IADL Disability                       | 129                                                    | 21                | 102                                                 | 44                | 51.77                             | <.001    |
| Received social support ( <i>M</i> ± <i>SD</i> ) | 17.1±5.5                                               |                   | 14.8±5.3                                            |                   | 6.12                              | <.001    |
| <i>Need Factors</i>                              |                                                        |                   |                                                     |                   |                                   |          |
| ACES ( <i>M</i> ± <i>SD</i> )                    | 2.1±2.2                                                |                   | 2.9±2.6                                             |                   | 4.61                              | <.001    |
| # of traumas ( <i>M</i> ± <i>SD</i> )            | 10.8±10.2                                              |                   | 13.8±10.5                                           |                   | 4.25                              | <.001    |
| Military sexual trauma (yes)                     | 85                                                     | 10                | 57                                                  | 25                | 37.32                             | <.001    |
| Psychological distress ( <i>M</i> ± <i>SD</i> )  | 0.6±1.1                                                |                   | 1.9±1.5                                             |                   | 15.62                             | <.001    |
| # of medical conditions ( <i>M</i> ± <i>SD</i> ) | 2.9±2.2                                                |                   | 4.4±2.4                                             |                   | 9.27                              | <.001    |
| Insomnia severity ( <i>M</i> ± <i>SD</i> )       | 9.1±5.8                                                |                   | 14.6±6.8                                            |                   | 12.92                             | <.001    |



|                                               |          |    |          |    |       |       |
|-----------------------------------------------|----------|----|----------|----|-------|-------|
| Lifetime Suicide Attempt (yes)                | 36       | 6  | 45       | 17 | 29.57 | <.001 |
| Functioning ( <i>M±SD</i> )                   | -0.5±1.1 |    | -1.9±1.4 |    | 17.03 | <.001 |
| Resilience ( <i>M±SD</i> )                    | 37.5±6.9 |    | 32.9±8.3 |    | 9.09  | <.001 |
| Purpose in life ( <i>M±SD</i> )               | 19.3±5.2 |    | 16.7±6.2 |    | 6.81  | <.001 |
| Dispositional optimism ( <i>M±SD</i> )        | 4.6±1.5  |    | 3.7±1.8  |    | 7.66  | <.001 |
| Grit ( <i>M±SD</i> )                          | 3.6±0.6  |    | 3.1±0.7  |    | 9.78  | <.001 |
| <i>Perceived stigma and barriers to care</i>  |          |    |          |    |       |       |
| It would be too embarrassing                  | 113      | 18 | 26       | 10 | 10.12 | .001  |
| It would harm my reputation                   | 90       | 14 | 25       | 10 | 2.12  | .14   |
| My peers might treat me differently           | 101      | 14 | 36       | 14 | 0.06  | .81   |
| My peers would blame me for the problem       | 62       | 9  | 23       | 11 | 1.12  | .29   |
| I would be seen as weak                       | 118      | 18 | 48       | 21 | 1.13  | .29   |
| People important to me would think less of me | 111      | 17 | 40       | 18 | 0.01  | .91   |
| I do not know where to get help               | 74       | 12 | 25       | 11 | 0.03  | .87   |
| I do not have adequate transportation         | 21       | 4  | 18       | 8  | 7.27  | .007  |
| It is difficult to schedule an appointment    | 54       | 10 | 41       | 20 | 19.90 | <.001 |
| Getting treatment costs too much money        | 152      | 25 | 56       | 25 | 0.00  | 1.00  |
| Mental healthcare does not work               | 93       | 15 | 32       | 16 | 0.02  | .87   |
| I do not trust mental health professionals    | 139      | 20 | 44       | 24 | 1.22  | .27   |

Note. ACES = Adverse Childhood Experiences Scale; ADL = activities of daily living; OR = odds ratio; IADL = instrumental activities of daily living.

<sup>a</sup> Veterans in his subgroup were veterans who screened positive for current posttraumatic stress disorder, major depressive disorder, generalized anxiety disorder, alcohol use disorder, and/or drug use disorder.

Figure S1. Results of relative importance analyses of factors associated with current mental healthcare utilization in U.S. military veterans

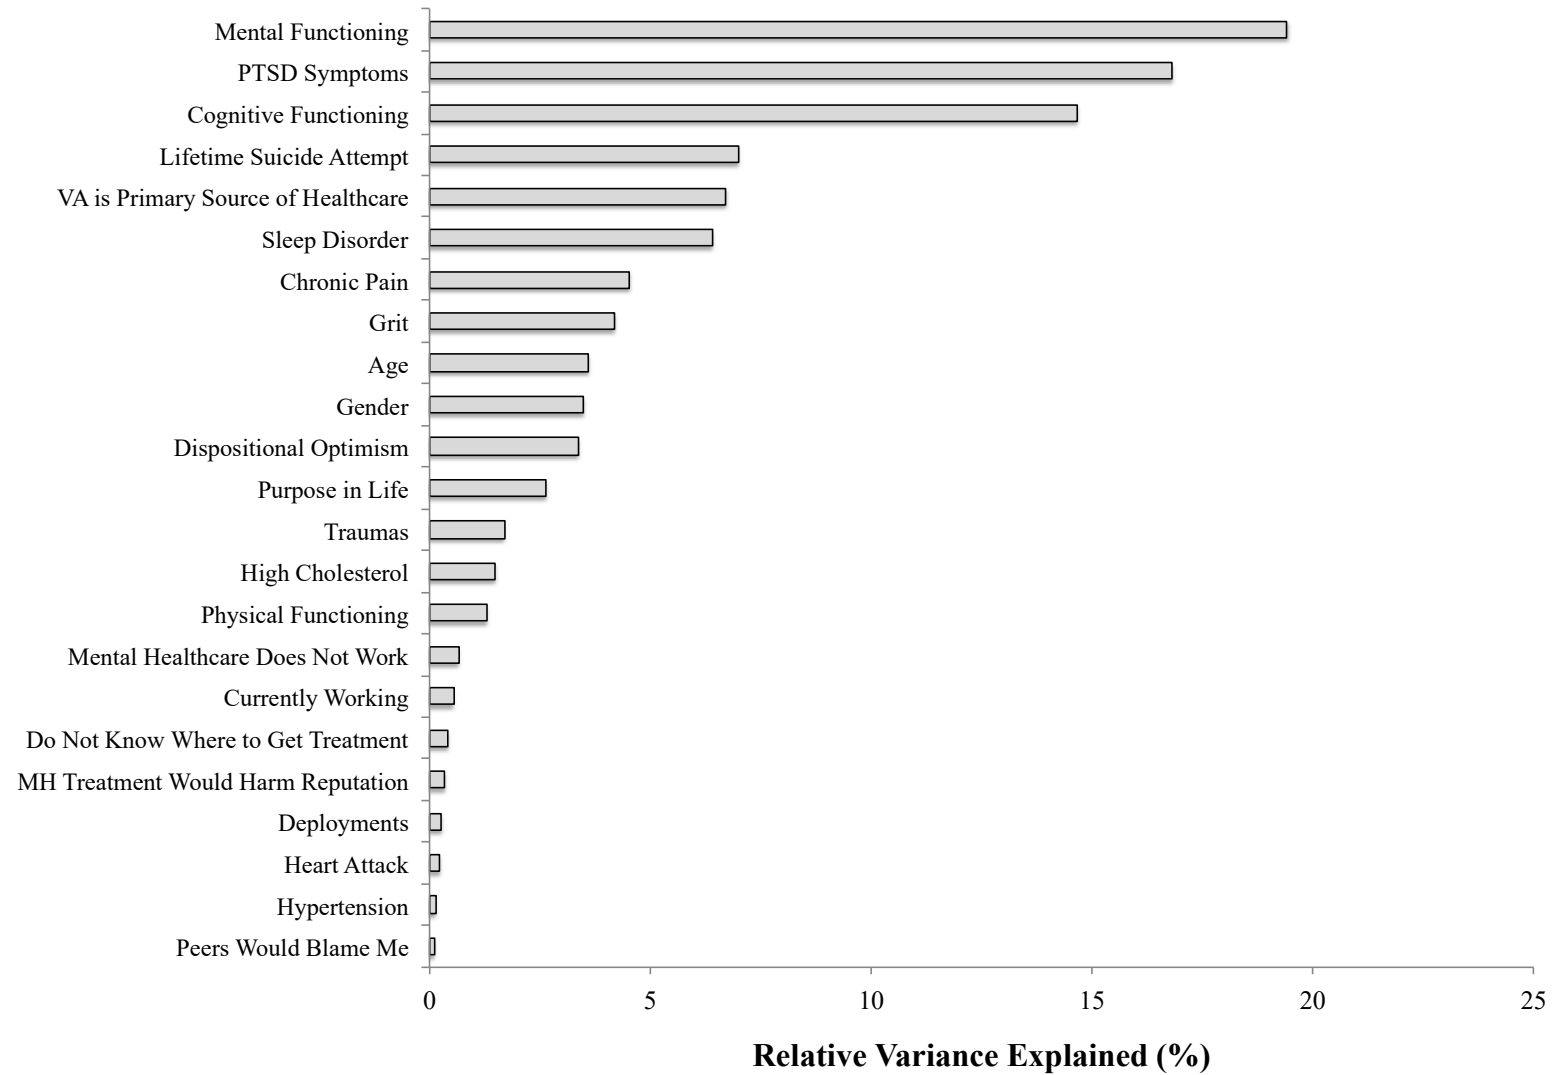

Figure S2. Results of relative importance analyses of factors associated with current mental healthcare utilization in U.S. military veterans who screened positive for a mental and/or substance use disorder

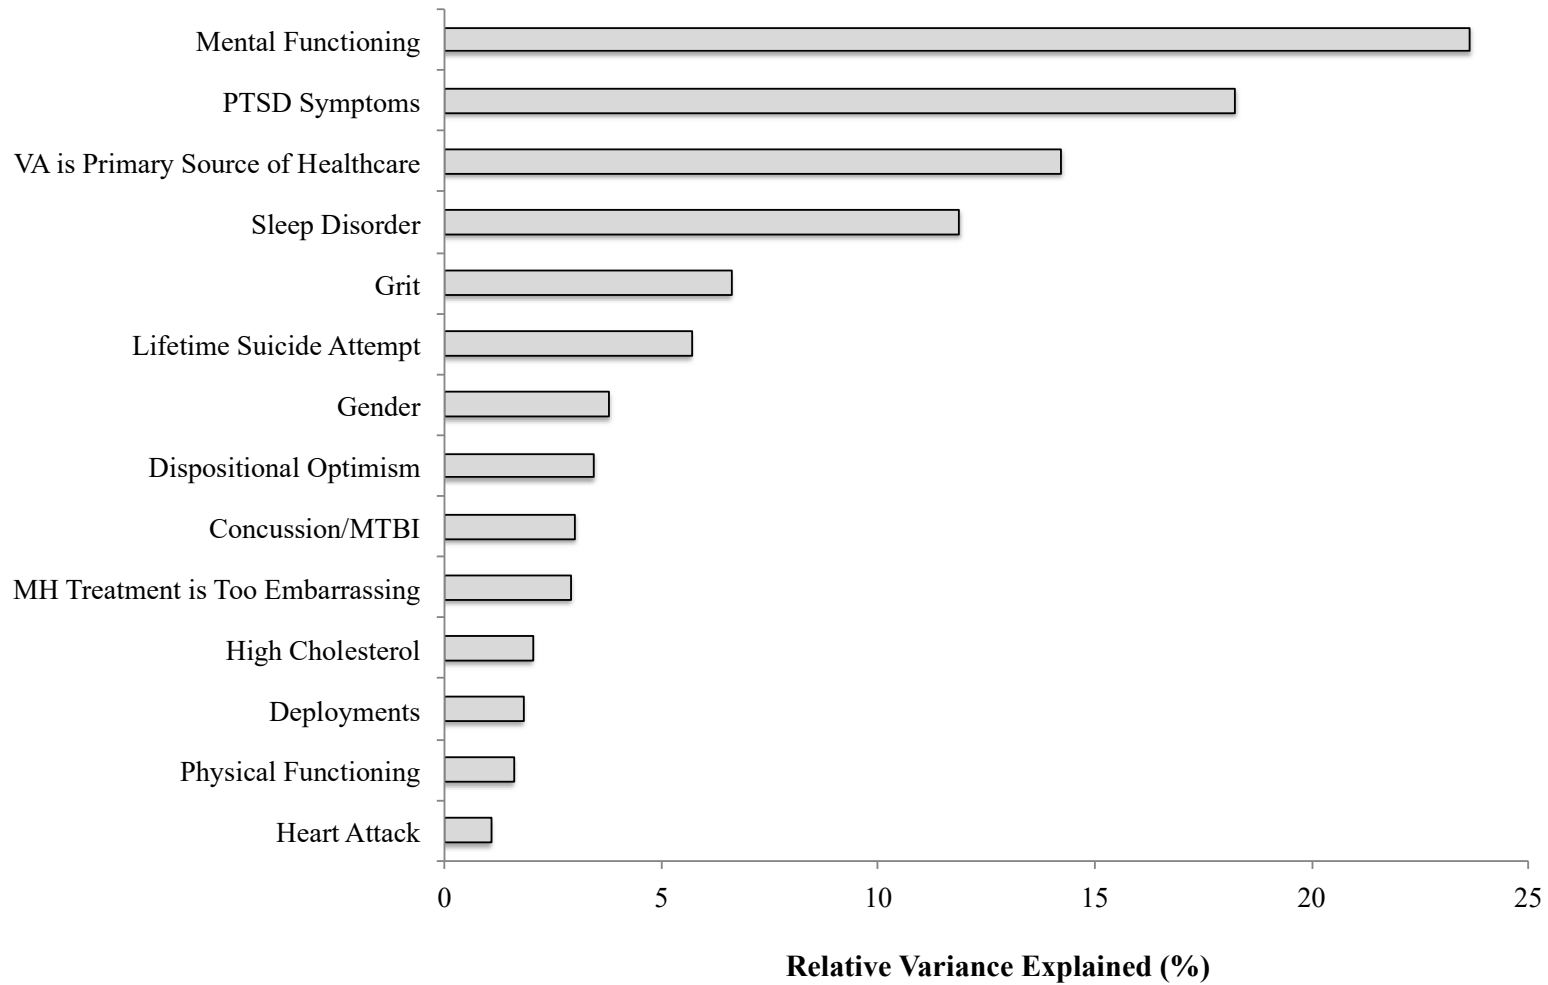

Supplement: appi.ps.202100112.ds001.pdf [file appi.ps.202100112.ds001.pdf]
